# Supplementary material
Source: Royal Society of Chemistry journal article supplement (doi:10.1039/d6ce00269b)
Supplement: d6ce00269b1.pdf [file d6ce00269b1.pdf]

## SUPPLEMENTARY INFORMATION

### Weak interactions in metallo-supramolecular grid crystals: an analysis of their effects

Jack Harrowfield<sup>1</sup>, Juan Ramirez<sup>1,2,3</sup> and Adrian-Mihail Stadler<sup>1,2,3</sup>

<sup>1</sup>Institut de Science et d'Ingénierie Supramoléculaires (ISIS), UMR 7006, CNRS - Université de Strasbourg, 8 Allée Gaspard Monge, 67000 Strasbourg, France

<sup>2</sup>University of Strasbourg Institute for Advanced Study (USIAS), 5 Allée du Général Rouvillois, 67083 Strasbourg, France

<sup>3</sup>Institut für Nanotechnologie (INT), Karlsruhe Institut für Technologie (KIT), 76344 Eggenstein-Leopoldshafen, Germany

#### Contents

|                                                                                                        |   |
|--------------------------------------------------------------------------------------------------------|---|
| S1. Hirshfeld surface diagrams for the grid units.....                                                 | 1 |
| S2. Analysis of the Hirshfeld surfaces.....                                                            | 3 |
| S3. Representations of the hydrogen bonding in neutral grid hydrates referred to in the main text..... | 6 |

S1. Hirshfeld surface diagrams for the grid units (all views shown being approximately perpendicular to the grid mean plane and in "transparent" mode).

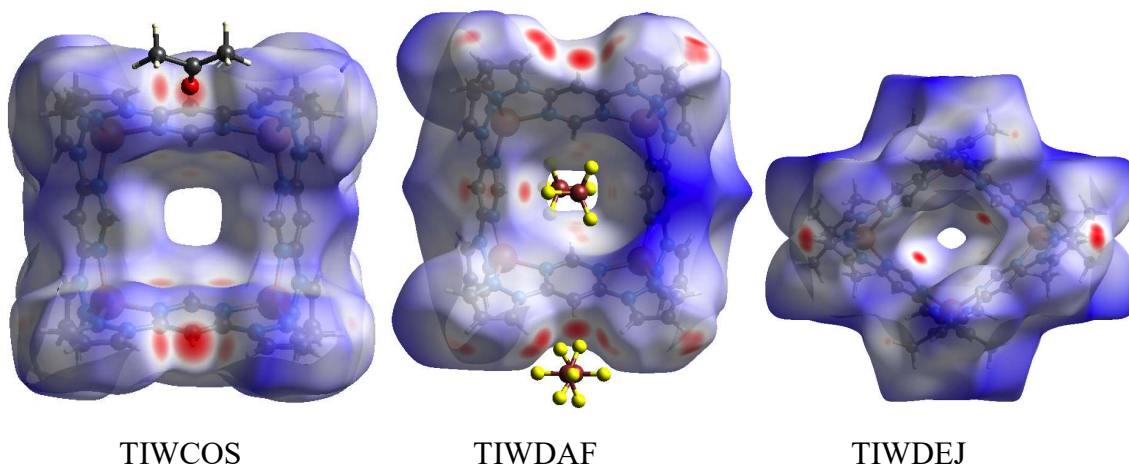

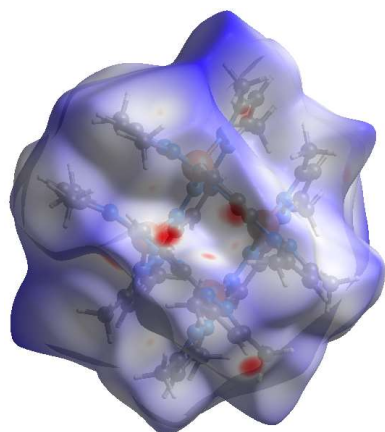

TIWDIN

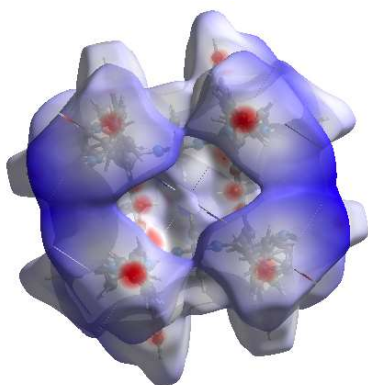

FEKRET

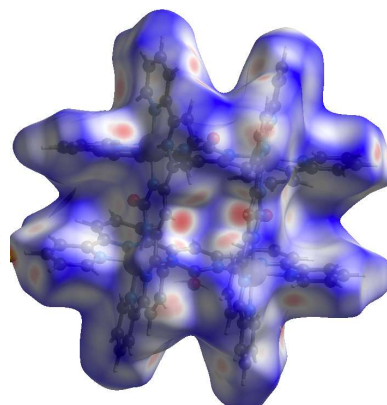

IYUBEJ

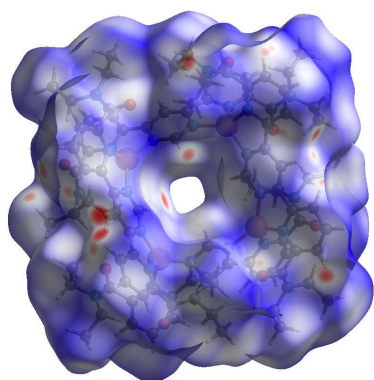

YENRUF

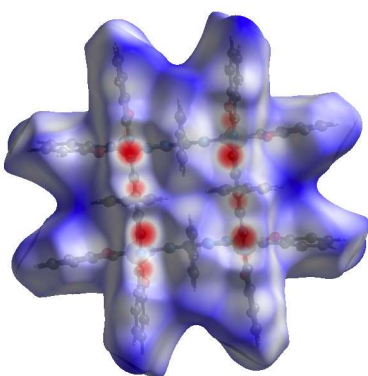

TIKXUI

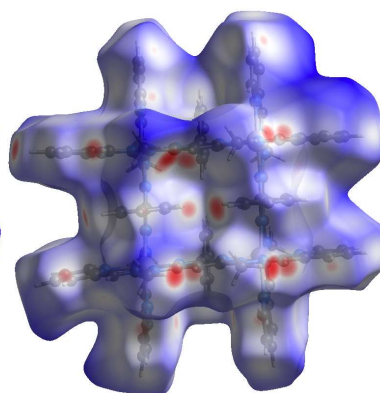

VEDJIY

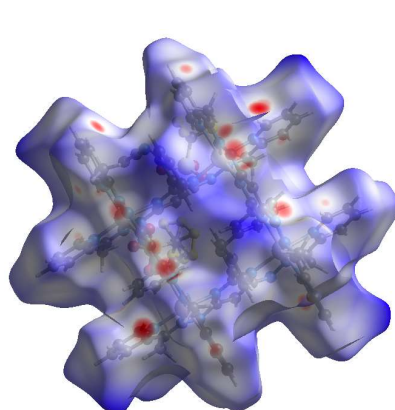

VEDJOE

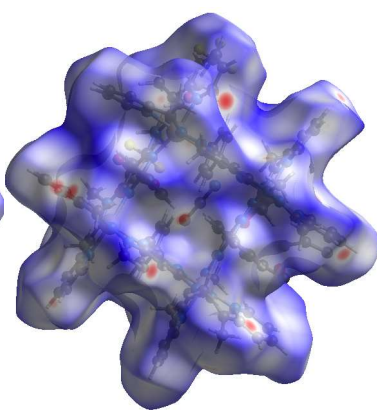

VEDJUK

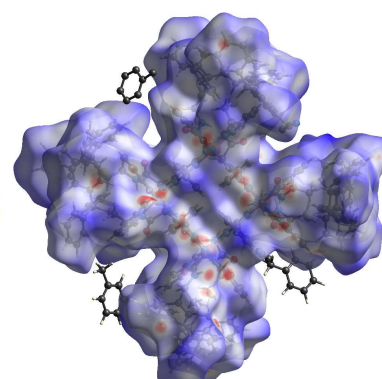

GUGTAE

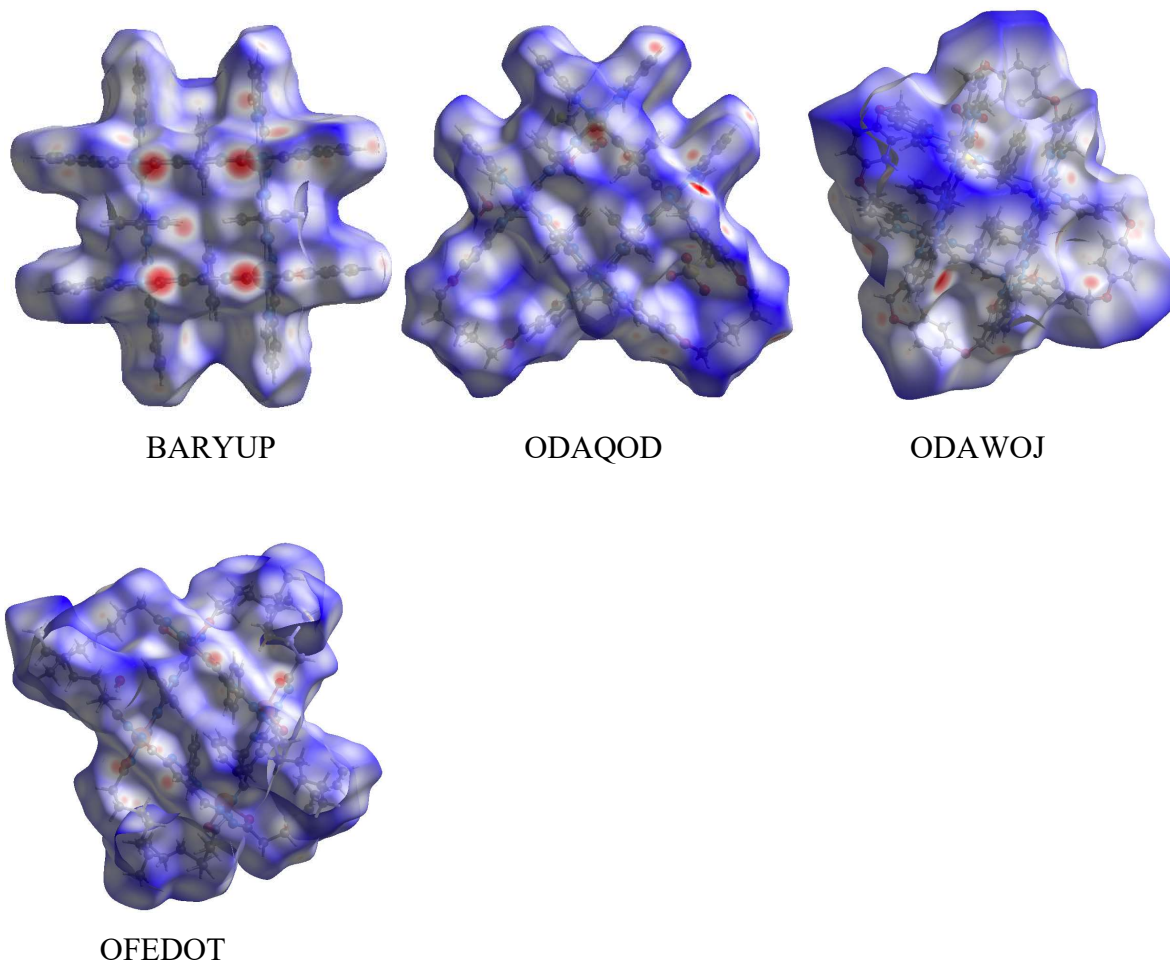

## S2. Analysis of the Hirshfeld surfaces

As provided by *CrystalExplorer*, red regions on the Hirshfeld surface designate points where separations of inner and outer atoms are less than the sum of their van der Waals radii and thus indicative of weak interactions. Thus, by consideration of the positions of all entities surrounding the grids themselves, it is possible to identify the atoms involved in these interactions. Examples are shown in the above figures in the cases of TIWCOS and TIWDAF for just some of the components of the grids' surroundings. (The figures become extremely congested when all the surrounding species are shown.) Once the close atoms are identified, their separation can be obtained and we have found it convenient to do so using *CrystalMaker* version 11.5.1 from CrystalMaker Software Ltd, UK, as all figures in the main text have been prepared with this software. In most instances, the external atoms involved in interactions are part of larger anions or molecules and in the main text figures the whole entities are shown.

For each structure currently considered, the atomic "contacts" indicative of weak interactions exceeding dispersion, as identified by the use of *CrystalExplorer*, are the following:

(Atom numbering as in the cited cif files; separations in Å)

(i) TIWCOS (one twofold rotation axis of symmetry) F2<sup>···</sup>C17 3.05, F6<sup>···</sup>C3 3.02, F7<sup>···</sup>C13 3.10, F9<sup>···</sup>C6 2.96, F10<sup>···</sup>C4 2.96, F11<sup>···</sup>C16 3.07, F12<sup>···</sup>C14 3.08; H3A<sup>···</sup>C14S 2.56, H8A<sup>···</sup>C14S 2.62, H13A<sup>···</sup>O1S 2.41, H15A<sup>···</sup>O1S 2.36.

(ii) TIWCUY (vertical plane of symmetry; contacts for ordered, included anions only) F1<sup>···</sup>C7 3.08, F3<sup>···</sup>H16 2.39, F7<sup>···</sup>C14 3.01, F7<sup>···</sup>H7 2.57.

(iii) TIWDAF (one twofold rotation axis of symmetry) F1<sup>···</sup>C6 3.02, F2<sup>···</sup>H7A 2.43, F3<sup>···</sup>H13B 2.50.

(iv) TIWDEJ (no symmetry) F3<sup>···</sup>H6A 2.27, F4<sup>···</sup>H41A 2.34, F4<sup>···</sup>H34A 2.46, F6<sup>···</sup>H5A 2.39, F11<sup>···</sup>H30A 2.45, F11<sup>···</sup>H40A 2.48, F11<sup>···</sup>C49 2.95, F12<sup>···</sup>H23A 2.48, F15<sup>···</sup>H20A 2.37, F16<sup>···</sup>H19A 2.40, F21<sup>···</sup>H25B 2.45, F22<sup>···</sup>H42B 2.43, F30<sup>···</sup>C32 2.96, C29<sup>···</sup>H56C 2.72 (reciprocal interaction with neighbouring grids). Only cation-anion contacts are shown in Figure 3 of the main text.

(v) TIWDIN (no symmetry) O52<sup>···</sup>H17A 2.43, O53<sup>···</sup>H11E 2.40, O61<sup>···</sup>H13A 2.39, O62<sup>···</sup>H48A 2.39, O63<sup>···</sup>H27A 2.37, O63<sup>···</sup>H31E 2.58, C51<sup>···</sup>H11A 2.82, C52<sup>···</sup>H11A 2.78 plus other interactions involving adjacent grids C12<sup>···</sup>H21A 2.78, C13<sup>···</sup>H21A 2.78, C63<sup>···</sup>H11C 2.76, C73<sup>···</sup>H31F 2.74. Only cation-anion contacts are shown in Figure 3 of the main text.

(vi) FEKRET (twofold rotation axis perpendicular to the Fe<sub>4</sub> plane) O11<sup>···</sup>H31E 2.56, O14<sup>···</sup>H31E 2.55, C115<sup>···</sup>C1B 3.12, C115<sup>···</sup>C3B 3.30, C115<sup>···</sup>H21E 2.265, C115<sup>···</sup>H31A 2.68 are the only contacts clearly identifiable.

(vii) SIQPIR Extensive disorder in this structure negated application of *CrystalExplorer*.

(viii) IYUBEJ (twofold rotation axis perpendicular to the Fe<sub>4</sub> plane) C11<sup>···</sup>H3A 2.73, C11<sup>···</sup>H43A 2.53, C11<sup>···</sup>F14 2.92, N2A<sup>···</sup>C111 2.90, N2A<sup>···</sup>H49A 2.24, F13<sup>···</sup>H44A 2.44, F22<sup>···</sup>H1A 2.22. Some other seemingly very short F<sup>···</sup>H contacts involve disordered anions.

(ix) YENRUF (no symmetry) F12<sup>···</sup>H2A 2.39, F14<sup>···</sup>H5C 2.61, F14<sup>···</sup>H18C 2.47, F15<sup>···</sup>H12C 2.56, F21<sup>···</sup>H2S1 2.60, F21<sup>···</sup>H16B 2.49, F21<sup>···</sup>C19B 3.11, F22<sup>···</sup>H2B 2.62, F24<sup>···</sup>H2D 2.50, F31<sup>···</sup>H5D 2.40, F32<sup>···</sup>H5A 2.32, F32<sup>···</sup>H12A 2.37, F33<sup>···</sup>H12A 2.50, F36<sup>···</sup>H18D 2.43, F41<sup>···</sup>H12B 2.45, F42<sup>···</sup>H5B 2.39, F42<sup>···</sup>H10C 2.38, F42<sup>···</sup>H18B 2.56, F43<sup>···</sup>H12B 2.53, F44<sup>···</sup>H16D 2.38, O20B<sup>···</sup>H2S3 2.55, O1W<sup>···</sup>H32E 2.42. Presumed H-bond acceptance F13<sup>···</sup>O1W 2.90. Inter-grid C16D<sup>···</sup>H16C 2.78, O27C<sup>···</sup>H17B 2.66.

(x) TIKXUI (centrosymmetric, all Fe centres equivalent) F1<sup>···</sup>H2A 1.92, F3<sup>···</sup>H18 2.25, F4<sup>···</sup>H5A 1.92. No interactions beyond dispersion of the water molecules were evident.

(xi) VEDJIY (twofold rotation axis about the Zn<sub>2</sub>-Zn<sub>3</sub> vector) F8<sup>··</sup>H2 2.58, F12<sup>··</sup>H12 2.61, N17<sup>··</sup>H27 2.40, N20<sup>··</sup>H23 2.58, O1<sup>··</sup>H41 2.49, O1<sup>··</sup>H42 2.42, O1<sup>··</sup>H43 2.41, O3<sup>··</sup>H25 2.30, O4<sup>··</sup>H19 2.50, O6<sup>··</sup>H22 2.48, O7<sup>··</sup>H6 2.21, O7<sup>··</sup>H5 2.38, O9<sup>··</sup>H4 2.61, O11<sup>··</sup>H11 2.49, O9<sup>··</sup>H20 2.43, O11<sup>··</sup>H11 2.49, O11<sup>··</sup>H35 2.24, O12<sup>··</sup>H31 2.28.

(xii) VEDJOE (twofold rotation axes about both ZnZn diagonals, all Zn centres equivalent) N3<sup>··</sup>O5 2.75, N6<sup>··</sup>O2 2.80, O1<sup>··</sup>H20 2.43, O2<sup>··</sup>H16 2.57, O4<sup>··</sup>H17 2.27, O5<sup>··</sup>H5 2.48, O5<sup>··</sup>H8 2.48.

(xiii) VEDJUK (no symmetry) N33<sup>··</sup>H23 2.62, N34<sup>··</sup>H8 2.59, O2<sup>··</sup>C53 3.06, O3<sup>··</sup>H46 2.56, O4<sup>··</sup>H95 2.59, O5<sup>··</sup>H52 2.43, O7<sup>··</sup>H50 2.34, O12<sup>··</sup>H72 2.46, O13<sup>··</sup>H24 2.59, O15<sup>··</sup>H81 2.39, O16<sup>··</sup>H36 2.47, O16<sup>··</sup>H37 2.59, O17<sup>··</sup>H59 2.52, O20<sup>··</sup>H71 2.63, O22<sup>··</sup>H78 2.59, O23<sup>··</sup>H43 2.38, O24<sup>··</sup>H104 2.52.

(xiv) GUGTAE (no symmetry) C99<sup>··</sup>H18C 2.52, C183<sup>··</sup>H126 2.59, N45<sup>··</sup>H227 2.33, N50<sup>··</sup>H87 2.32, F1<sup>··</sup>H19A 2.29, F2<sup>··</sup>H18B 2.29, F5<sup>··</sup>H9 2.11, F5<sup>··</sup>H25D 2.30, F5<sup>··</sup>H23C 2.36, F6<sup>··</sup>H25D 2.33, F8<sup>··</sup>H23C 2.41, F9<sup>··</sup>H159 2.52, F17<sup>··</sup>H29A 2.22, F17<sup>··</sup>H11A 2.41, F17<sup>··</sup>H93B 2.37, F17<sup>··</sup>H78 2.41, F18<sup>··</sup>H11A 2.43, F19<sup>··</sup>H146 2.38, F20<sup>··</sup>H93B 2.43, F22<sup>··</sup>H39A 2.17, F24<sup>··</sup>H23D 2.34, F24<sup>··</sup>H39A 2.27, F26<sup>··</sup>H17 2.37, F26<sup>··</sup>H19 2.40, F28<sup>··</sup>H10 1.91 (H-bond), O3<sup>··</sup>H30F 2.24, O4<sup>··</sup>H30D 2.39, O5<sup>··</sup>H30A, 2.30, O6<sup>··</sup>H232 2.33.

(xv) BARYUP (no symmetry) C124<sup>··</sup>O44 2.89, C217<sup>··</sup>O7C 3.15, C416<sup>··</sup>H128 2.74, O3B<sup>··</sup>H22D 2.55, O3C<sup>··</sup>H119 2.59, O6C<sup>··</sup>H118 2.63, O8B<sup>··</sup>H417 2.57, O10B<sup>··</sup>H312 2.60, O11B<sup>··</sup>H314 2.58, O11B<sup>··</sup>H116 2.55, O12B<sup>··</sup>H422 2.46, O33<sup>··</sup>H413 2.34, O42<sup>··</sup>H326 2.43, O51<sup>··</sup>H318 2.60, O51<sup>··</sup>H328 2.58, O53<sup>··</sup>H329 2.54, O61<sup>··</sup>H324 2.33, O64<sup>··</sup>H116 2.52, O73<sup>··</sup>H31A 2.07, O73<sup>··</sup>H314 2.46, O81A<sup>··</sup>H429 2.53, O82A<sup>··</sup>HAB 2.37, O82B<sup>··</sup>H418 2.34, O82B<sup>··</sup>H428 2.35 (\* O81 and 82 are part of disordered perchlorate ions). H-bonds: O1W<sup>··</sup>H12A 1.90, O2W<sup>··</sup>H11A 1.91, O3W<sup>··</sup>H32A 1.80, O4W<sup>··</sup>H21A 1.94, O4W<sup>··</sup>H21 2.55, O5W<sup>··</sup>H22C 1.89, O6W<sup>··</sup>H41A 1.88, O7W<sup>··</sup>H42A 1.89.

(xvi) ODAQOD (one twofold rotation axis of symmetry about the Zn<sub>2</sub>-Zn<sub>3</sub> vector) C013<sup>··</sup>N1-5 3.13, F2-4<sup>··</sup>H4A 2.44, O0W<sup>··</sup>H15C 2.41, O1-1<sup>··</sup>H17A 2.62, O1-3<sup>··</sup>H12A 2.57, O2-1<sup>··</sup>H5B 2.53, O2-1<sup>··</sup>H16A 2.54, O2-4<sup>··</sup>H15D 2.19, O4A<sup>··</sup>H6B 2.56. Reciprocal contacts to other grids: C17B<sup>··</sup>H6A 2.74, O4A<sup>··</sup>H6B 2.56, O4A<sup>··</sup>H6B 2.56.

(xvii) ODAWOJ (twofold rotational symmetry) C29A<sup>··</sup>H51B 2.69, C41<sup>··</sup>O8 2.98, C50<sup>··</sup>O8 2.88, O2A<sup>··</sup>H3A 2.54, O2B<sup>··</sup>H37 2.38, O3<sup>··</sup>H9 2.55, O3<sup>··</sup>H18 2.50, O6<sup>··</sup>H14 2.46, O7<sup>··</sup>H25A 2.37, O10<sup>··</sup>H54A 2.37 (H disorder), O13<sup>··</sup>H60 2.36.

(xviii) OFEDOT (twofold rotation axis perpendicular to the Cu<sub>4</sub> mean plane) C11<sup>··</sup>O56 3.27, C19<sup>··</sup>H64B 3.15, N14<sup>··</sup>H81B 2.17, O1<sup>··</sup>H51A 2.46, O41<sup>··</sup>H81A 2.11, O56<sup>··</sup>H11A 2.36.

S3. Representations of the hydrogen bonding in neutral grid hydrates referred to in the main text using O...O and O...N separations obtained by analysis of the structure OFEDOT. In all these figures, water molecule O-atoms are shown in green.

Fig. S3(i) CCDC 637557

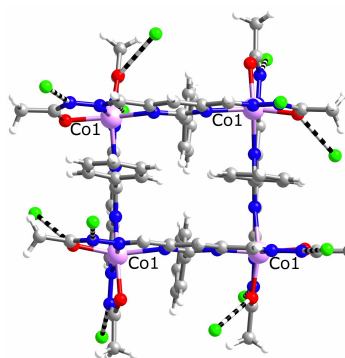

(inversion centre)

Fig. S3(ii) CCDC 637558

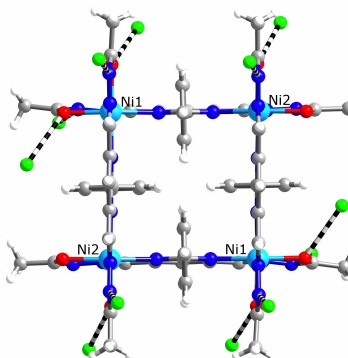

(twofold rotation about Ni1Ni1)

Fig. S3(iii) CCDC 637559

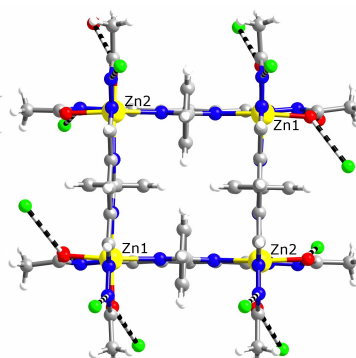

(twofold rotation about Zn1Zn1)

Fig. S3(iv) CCDC 637560

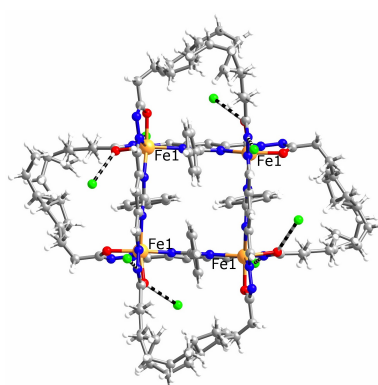

(inversion centre)

Fig. S3(v) CCDC 637561

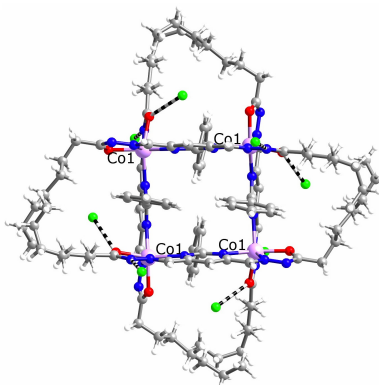

(inversion centre)

Fig. S3(vi) CCDC 637562

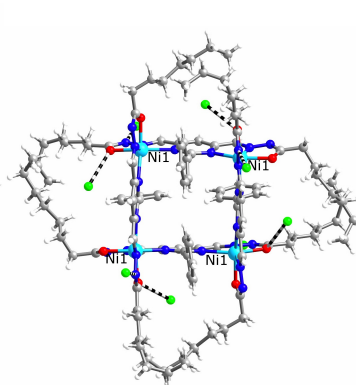

(inversion centre)

Fig. S3(vii) CCDC 637564

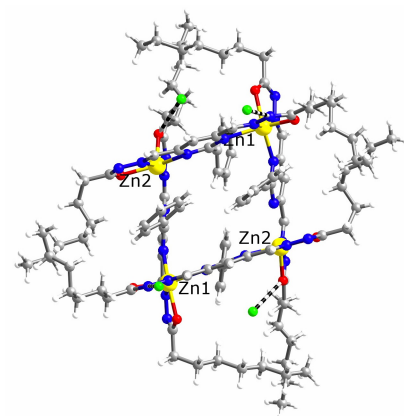

(twofold rotation axes)
